# Supplementary material
Source: PubMed Central journal article supplement (PMC3328586)

# Supplementary Figure S1

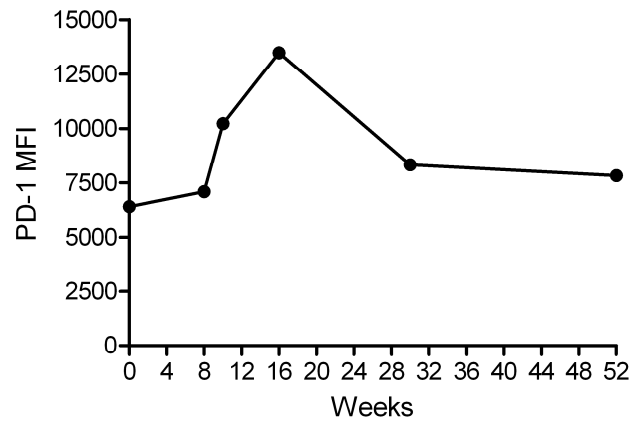

Supplement: NIHMS352519-supplement-Supp1.pdf [file NIHMS352519-supplement-Supp1.pdf]

# Supplementary Figure S2

**a**

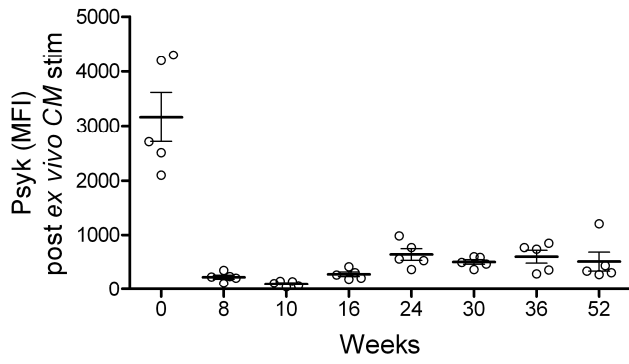

**b**

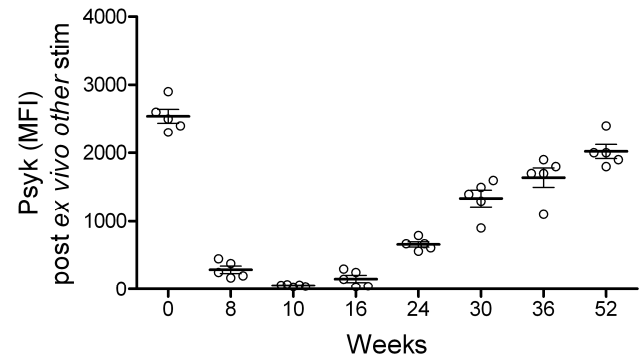

Supplement: NIHMS352519-supplement-Supp2.pdf [file NIHMS352519-supplement-Supp2.pdf]
